# Supplementary material
Source: PubMed Central journal article supplement (PMC3270964)
Supplement: supp_M111.262543_jbc.M111.262543-1.pdf [file supp_M111.262543_jbc.M111.262543-1.pdf]

**Figure S1. Time course of gp120 effects on acetylcholine-stimulated currents in SH-SY5Y cells.** (A) Whole-cell representative current traces recorded from either control SH-SY5Y cells or cells treated with 1500 nM gp120 for 1, 24, or 48 hours. (B) The average current density for control SH-SY5Y cells was  $19.7 \pm 2.8$  pA/pF ( $n = 14$ ). The average current density for cells exposed to gp120 for 1, 24, and 48 hours was  $31.9 \pm 5.5$  pA/pF ( $n = 10$ ),  $39.3 \pm 8.6$  pA/pF ( $n = 14$ ), and  $35.6 \pm 6.9$  pA/pF ( $n = 9$ ), respectively. Currents were recorded as described for Figure 1. \*, p-value < 0.05

**Figure S2. Up-regulation of the  $\alpha 7$ -nAChR requires activation of MEK.** (A) Whole-cell representative current traces recorded from SH-SY5Y cells, cells treated with SDF1, or cells treated with SDF1 and PD98059. (B) The average current density for SDF1-treated cells was  $107.1 \pm 22.6$  pA/pF ( $n = 12$ ) and was  $50.1 \pm 13.1$  pA/pF ( $n = 13$ ) for cells treated with SDF1 and SDF1 + PD98059.

**Figure S3. Real-time PCR and Western blot analysis of  $\alpha 7$ -nAChR in hippocampus of gp120-transgenic mice.** No difference in  $\alpha 7$ -nAChR mRNA (A) or protein levels (B) was detected in the hippocampus of gp120 transgenic mice as compared with WT ( $n = 3$ ).

**Supplemental videos.  $\text{Ca}^{2+}$  mobilization in SH-SY5Y cells.** HIV-gp120 treated SH-SY5Y cells stimulated with ACh (VS2) present larger calcium mobilization when compared to control cells (VS1). The specific  $\alpha 7$ -nAChR antagonist MLA inhibits  $\text{Ca}^{2+}$  mobilization in response to ACh (VS3 and VS4), showing that the change in intracellular  $[\text{Ca}^{2+}]$  requires this receptor.
